# Supplementary material for: Microwave-Assisted Hydrodistillation of Hop (Humulus lupulus L.) Terpenes: A Pilot-Scale Study
Source: MDPI journal article supplement (doi:10.3390/foods10112726), 2021-11-07
Supplement: s1 [file s1]

# Microwave-Assisted Hydrodistillation of Hop (*Humulus lupulus* L.) Terpenes: A Pilot-Scale Study

Lorenzo Lamberti<sup>1,2</sup>, Giorgio Grillo<sup>1</sup>, Lorenzo Gallina<sup>1</sup>, Diego Carnaroglio<sup>3</sup>, Farid Chemat<sup>4</sup> and Giancarlo Cravotto<sup>1,\*</sup>

<sup>1</sup> Dipartimento di Scienza e Tecnologia del Farmaco, University of Turin, Via P. Giuria 9, 10125, Turin, Italy;  
<sup>2</sup> Baladin S.S.Agricola, via Carrù 23, 12060 Piozzo, Cuneo, Italy;  
<sup>3</sup> Milestone srl, via Fatebenefratelli, 1-5, Sorisole 24010, Italy.  
<sup>4</sup> Avignon University, INRAE, UMR 408, GREEN Extraction Team, F-84000 Avignon, France.  
\* Correspondence: Correspondence: giancarlo.cravotto@unito.it;

Entries reported in the document (Table S5 and S6, Figure S1 and S2) refers to the same samples.

**Table S1.** Standard Operating Procedure (SOP) standardized MAHD protocol.

| Step | Time (min) | Power (W) |
|------|------------|-----------|
| 1    | 15         | 1800      |
| 2    | 75         | 1100      |

**Table S2.** ETHOS XL extraction protocols. A: half capacity or lower; B: more than half the capacity.

| A: Low Loading (LL) |             |       |       | B: Full Loading (FL) |             |       |       |
|---------------------|-------------|-------|-------|----------------------|-------------|-------|-------|
|                     |             | Time  | Power |                      |             | Time  | Power |
| Step                |             | (min) | (W)   | Step                 |             | (min) | (W)   |
| 1                   | Up to 100°C |       | 4000  | 1                    | Up to 100°C |       | 4000  |
| 2                   |             | 10    | 4000  | 2                    |             | 30    | 4000  |
| 3                   |             | 60    | 3200  | 3                    |             | 90    | 3200  |

**Table S3.** MAHD vacuum extraction protocol A and B.

| Protocol A |       |       |           | Protocol B |       |       |           |
|------------|-------|-------|-----------|------------|-------|-------|-----------|
| Step       | Time  | Power | Tempera-  | Step       | Time  | Power | Tempera-  |
|            | (min) | (W)   | ture (°C) |            | (min) | (W)   | ture (°C) |
| 1          | 10    | 1200  | 95        | 1          | 10    | 1800  | 99        |
| 2          | 100   | 1200  | 95        | 2          | 100   | 1600  | 99        |

**Table S4.** GC temperature protocol.

| °C/min. | Final temperature | Hold |
|---------|-------------------|------|
| 0       | 35                | 2    |
| 5       | 65                | 0    |
| 2       | 85                | 0    |
| 10      | 130               | 0    |
| 2       | 150               | 0    |
| 10      | 300               | 0    |

Table S5. MAHD screening summary.

| Entry | Hops |            | L/S (L/kg) | Volatiles (mL)                      | Yield (mL <sub>VF</sub> /kg) | Dry Yield (mL <sub>VF</sub> /kg <sub>dry matrix</sub> ) | Type of evaluation    |
|-------|------|------------|------------|-------------------------------------|------------------------------|---------------------------------------------------------|-----------------------|
|       | Type | Weight (g) |            |                                     |                              |                                                         |                       |
| 1     | FH   | 1200       | 0.5        | 6                                   | 5.00                         | 16.67                                                   | SOP                   |
| 2     | DH   | 400        | 1          | 3.7                                 | 9.25                         | 10.51                                                   |                       |
| 3     | PH   | 1000       | 3          | 3.3                                 | 3.30                         | 3.75                                                    |                       |
| 4     | FH   | 1200       | 0.25       | <i>Burned material, no recovery</i> |                              |                                                         | Moistening evaluation |
| 5     | FH   | 1100       | 1          | 5.5                                 | 5.00                         | 16.67                                                   |                       |
| 6     | FH   | 1200       | 2          | 5.5                                 | 4.58                         | 15.28                                                   |                       |
| 7     | FH   | 1300       | 1          | 8.0                                 | 6.15                         | 20.51                                                   | Mild MAHD             |
| 8     | DH   | 1000       | 1          | 7.5                                 | 7.50                         | 8.52                                                    |                       |
| 9     | PH   | 1300       | 1          | 3.2                                 | 2.46                         | 2.80                                                    |                       |
| 10    | FH   | 3000       | 1          | 15.9                                | 5.30                         | 17.67                                                   |                       |
| 11    | FH   | 2500       | 0.5        | 13.0                                | 5.20                         | 17.33                                                   | Pilot (LL)            |
| 12    | DH   | 2000       | 1          | 20.7                                | 10.35                        | 11.76                                                   |                       |
| 13    | PH   | 2000       | 1          | 11.0                                | 5.50                         | 6.25                                                    |                       |
| 14    | FH   | 8200       | 0.5        | 36.0                                | 4.39                         | 14.63                                                   | Pilot (FL)            |
| 15    | DH   | 3820       | 1          | 50.0                                | 13.09                        | 14.87                                                   |                       |
| 16    | PH   | 4000       | 1          | 38.0                                | 9.50                         | 10.80                                                   |                       |
| 17    | FH   | 700        | 1          | 1.7                                 | 2.43                         | 8.10                                                    | Vacuum MAHD           |
| 18    | FH   | 700        | 1          | 1.9                                 | 2.71                         | 9.05                                                    |                       |

FH: Fresh hops; DH: Dried hops; PH: Pelletized hops.

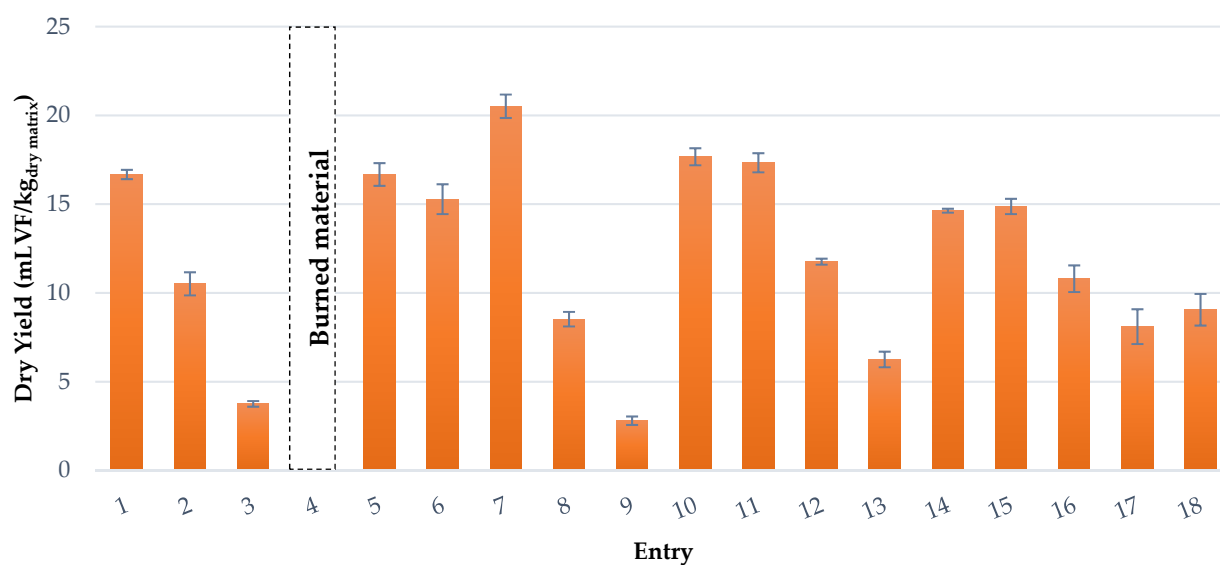

Figure S1. Volatiles fraction extraction yields summary. Results reported as average  $\pm$  SD.

**Table S6.** Energy consumption evaluation.

| Entry | Volatile Fraction (mL) | Energy Consumption |                        |
|-------|------------------------|--------------------|------------------------|
|       |                        | (kJ)               | (kJ/mL <sub>VF</sub> ) |
| 1     | 6                      | 22770              | 3795                   |
| 2     | 3.7                    | 22770              | 6154                   |
| 3     | 3.3                    | 22770              | 6900                   |
| 4     | -                      | 22770              | -                      |
| 5     | 5.5                    | 22770              | 4140                   |
| 6     | 5.5                    | 22770              | 4140                   |
| 7     | 8                      | 29532              | 3692                   |
| 8     | 7.5                    | 29532              | 3938                   |
| 9     | 3.2                    | 29532              | 9229                   |
| 10    | 15.9                   | 97032              | 6103                   |
| 11    | 13                     | 40320              | 3102                   |
| 12    | 10.5                   | 40320              | 3840                   |
| 13    | 11                     | 40320              | 3665                   |
| 14    | 36                     | 65880              | 1830                   |
| 15    | 50                     | 65880              | 1318                   |
| 16    | 38                     | 65880              | 1734                   |
| 17    | 1.7                    | 22321              | 13130                  |
| 18    | 1.9                    | 24466              | 12877                  |

*Note:* In the energy consumption evaluation, both reactors and respective chiller has been taken in account.

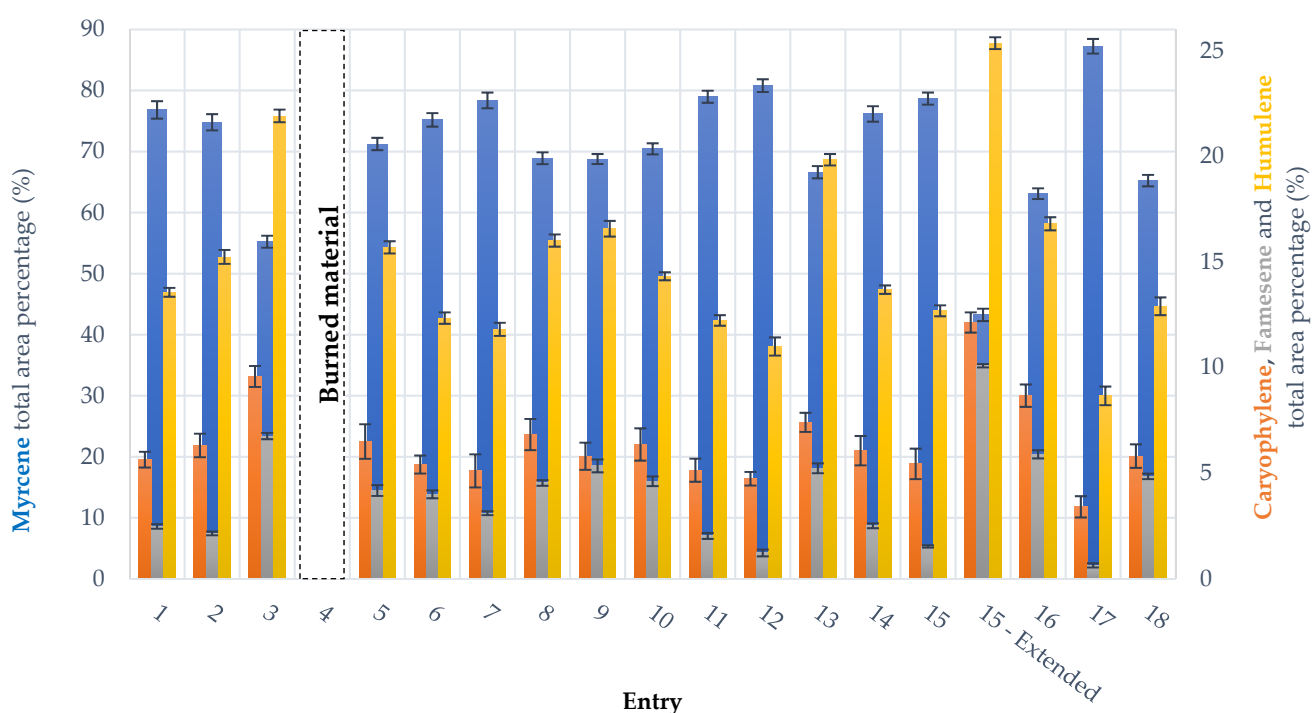

**Figure S2.** Main terpenoids distribution across MAHD screening, GC-MS analysis. Entry 15 – extended are reported in Paragraph 3.2.3. Results reported as average  $\pm$  SD.
